# Supplementary material
Source: PubMed Central journal article supplement (PMC4695211)
Supplement: NIHMS739248-supplement-Supplement.pdf [file NIHMS739248-supplement-Supplement.pdf]

## **SUPPLEMENTAL FIGURE LEGENDS:**

**Supplemental figure 1:** *TCR mediated stabilization of  $\beta$ -catenin does not require Jnk or p38 activities.* Sorted DP thymocytes were stimulated as in figure 2 for two hours prior to processing for Western blot analysis. Blots were probed with antibodies against  $\beta$ -catenin or  $\beta$ -actin for loading control as indicated. Lanes 1 depict the untreated samples. Lanes 2-4 are samples stimulated by plate bound anti CD3 plus anti CD28 for 2 hours. Lanes 3 are samples stimulated in the presence of vehicle (DMSO). Lanes 4 are samples stimulated in the presence of 15mM of inhibitor XI for Jnk inhibition or inhibitor SB202190 for p38 inhibition. Numbers under the lanes indicate the levels of  $\beta$ -catenin compared to the untreated samples. Blots are representative of 3 independent Jnk inhibition and 2 independent p38 inhibition experiments.

# Supplemental figure 1

Jnk inhibition

1 2 3 4

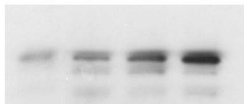

p38 inhibition

1 2 3 4

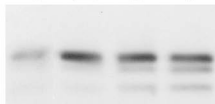

$\beta$ -catenin

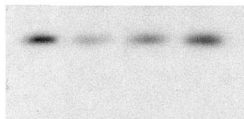

$\beta$ -actin

1 3.8 3.6 3.1

1 7.1 2.9 8.6
